# Supplementary material
Source: publisher site journal article supplement (https://www.spandidos-publications.com/2355/downloadSupplementary)

Figure S1. Fluorescence microscopy analysis of HeLa cells transiently transfected with early growth response factor-1-enhanced green fluorescent protein plasmid and irradiated by 6 Gy once (magnification, x100).

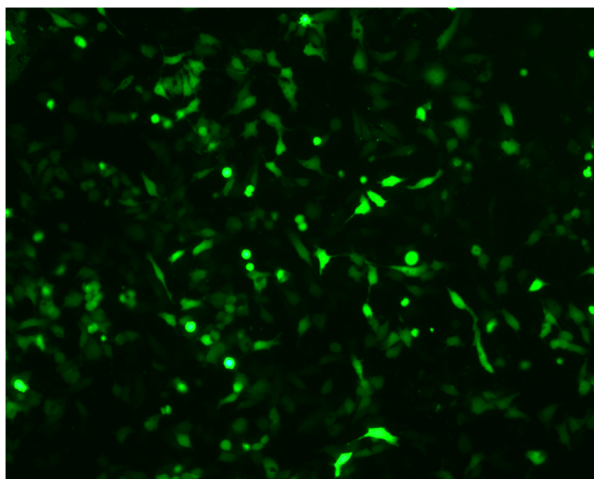

Supplement: Supplementary file 1 [file downloadSupplementary]
